# Supplementary material
Source: Springer Nature journal article supplement (https://www.springermedizin.de/resource/supplementary/13030_2013_156_MOESM2_ESM.pdf/9644866)

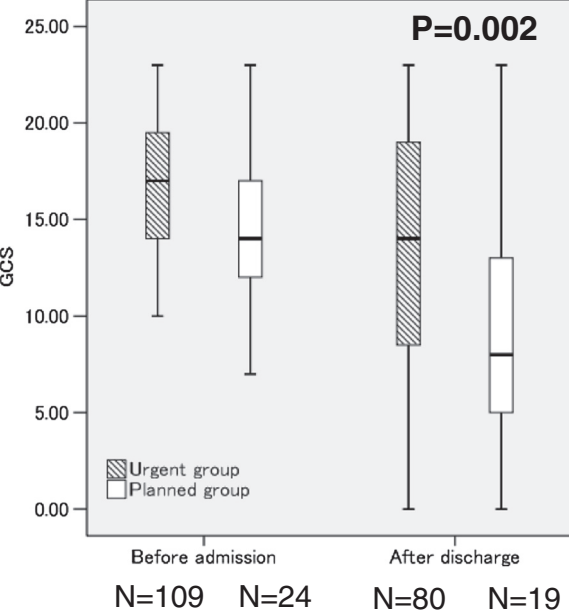

Supplement: MOESM2 [file 9644866]
